# Supplementary material for: Crosstalks between NOD1 and Histone H2A Contribute to Host Defense against Streptococcus agalactiae Infection in Zebrafish
Source: MDPI journal article supplement (doi:10.3390/antibiotics10070861), 2021-07-15
Supplement: s1 [file s1]

Table S1 Primer information

| Primer Name             | Primer Sequences (5' to 3')   | Application                              |
|-------------------------|-------------------------------|------------------------------------------|
| zfH2A-6F                | GTCAAGCTTAAGACCAAGATGAGCGGAA  | Ligated to<br>p3xFLAG-CMV™<br>-14 vector |
| zfH2A-6R                | GATGGTACCTTGCCCTTGGCAGCCTTCTC |                                          |
| NOD1F                   | GTGGAATTCTGAAATGAAATTAAATATGG |                                          |
| NOD1R                   | GAAGGATCCGCTGACTCCCTCTCGTTG   |                                          |
| H1_5_GeneID:321618F     | AGTCGGAGCTGTCCAAGAAA          | Quantitative<br>real-time PCR            |
| H1_5_GeneID:321618R     | GTTGTGCGCCACCTTGTAGT          |                                          |
| H1_5_GeneID:103911343F  | CATCTGTGAAGAAGGCGACA          |                                          |
| H1_5_GeneID:103911343R  | AAAAGAGCCGTTTGGGTTTT          |                                          |
| H2AF                    | ACGCCGCTCGGGACAACAAGAAG       |                                          |
| H2AR                    | GCGATGGTCACTCCACCCAGAAG       |                                          |
| H2BF                    | CGGTAAGGGAGGAAAGAAGCG         |                                          |
| H2BR                    | TGTAGTGAGCGAGACAAGACG         |                                          |
| H3F                     | GTGAGATCCGCCGCTACCAGAAG       |                                          |
| H3R                     | GTGTCCTCGAACAGACCAACCAG       |                                          |
| H4F                     | CAAAGGCGGTAAAGGTCTTGAAAA      |                                          |
| H4R                     | TCTTGGCGTGCTCGGTGTATGTAA      |                                          |
| ABCB11_GeneID:571189F   | CGGCTCCAGTAGCTCGTATC          |                                          |
| ABCB11_GeneID:571189R   | AGGATCTGGCATCGAAAATG          |                                          |
| ACOT8_GeneID:450052F    | CAGCGCTTCCTCAGTAAACC          |                                          |
| ACOT8_GeneID:450052R    | GCAGTTTCATATCGCCAGGT          |                                          |
| CH25H_GeneID:494109F    | TCCATAAGGTGCACCACAAA          |                                          |
| CH25H_GeneID:494109R    | GTTCAGCATGTGGAAGAGCA          |                                          |
| CH25H_GeneID:100005337F | GGATGTGTTCACTCCACACG          |                                          |
| CH25H_GeneID:100005337R | GCAAACGTTTCCCTGTTCAT          |                                          |
| CYP27A1_GeneID:322341F  | GGCCACAGAAAGCTGAAGAC          |                                          |
| CYP27A1_GeneID:322341R  | ACTGAAGCGAGTCCTTTGGA          |                                          |
| CYP27A1_GeneID:402831F  | GGCCACAGAAAGCTGAAGAC          |                                          |
| CYP27A1_GeneID:402831R  | TCTCCCCTGGAAGGAACTT           |                                          |
| CYP27A1_GeneID:558239F  | CTACCGGGGCCTCTTAAAC           |                                          |
| CYP27A1_GeneID:558239R  | AGACTTCAGGGTTCGAGCAA          |                                          |
| CYP27A1_GeneID:565876F  | CTGGATCCGAGAGCAGAAAC          |                                          |
| CYP27A1_GeneID:565876R  | GACGCATTTGCTTTGACAGA          |                                          |
| CYP27A1_GeneID:723999F  | CAACTGGACCCGCAATTACT          |                                          |
| CYP27A1_GeneID:723999R  | GCACCACCGGATACAGTCTT          |                                          |
| CYP27A1_GeneID:795106F  | GGCCACAGAAAGCTGAAGAC          |                                          |
| CYP27A1_GeneID:795106R  | GAACCGAGTCCTTTGGATGA          |                                          |
| CYP46A1_GeneID:393433F  | GATGAAGTCCTCGGAACCAA          |                                          |
| CYP46A1_GeneID:393433R  | GACAGGTTCGTGGACCAAGT          |                                          |
| CYP46A1_GeneID:393451F  | GATGAAGTCCTCGGAACCAA          |                                          |
| CYP46A1_GeneID:393451R  | GACAGGTTCGTGGACCAAGT          |                                          |
| CYP46A1_GeneID:553543F  | ACTTGGTCCACGAACCTGTC          |                                          |

|                          |                       |  |
|--------------------------|-----------------------|--|
| CYP46A1_GeneID:553543R   | GCGCCGTTACAACCTACATT  |  |
| CYP46A1_GeneID:641477F   | ATCATGGATCCAGCCTTCAG  |  |
| CYP46A1_GeneID:641477R   | ACGCAGGAGTTCAGTTGCTT  |  |
| CYP46A1_GeneID:692332F   | AACAGCCAATCAGCTCTCGT  |  |
| CYP46A1_GeneID:692332R   | GGCGCATTACATTAAACCT   |  |
| CYP7A1_GeneID:394148F    | TTCACAAGCCAACACTCTGC  |  |
| CYP7A1_GeneID:394148R    | TCATCGGTGGGTACATAGCA  |  |
| CYP7A1_GeneID:559097F    | CTTCATCGGCGGAAATGTAT  |  |
| CYP7A1_GeneID:559097R    | AGCAGCTGTTTGATCGGACT  |  |
| CYP7B1_GeneID:570455F    | CCGAACAGCTCTTTTTCAGG  |  |
| CYP7B1_GeneID:570455R    | TTTTTCTCTCCGAGCACGTT  |  |
| CYP8B1_GeneID:100004274F | CAGCGAATGAAAGCAAAACA  |  |
| CYP8B1_GeneID:100004274R | ACACTTTGCCATTCCCAGAC  |  |
| CYP8B1_GeneID:445281F    | GTGGTCAAAGAGGCAAGAGC  |  |
| CYP8B1_GeneID:445281R    | ACACTTTGCCATTCCCAGAC  |  |
| FABP6_GeneID:415166F     | CGTCCAGAACGGAGATGACT  |  |
| FABP6_GeneID:415166R     | TTGGGGAAGCTTATGGTCAG  |  |
| GPBAR1_GeneID:797190F    | CGACAGCTGGATTTTCAGACA |  |
| GPBAR1_GeneID:797190R    | AGGCTTTGGGAAAAACCTGT  |  |
| HSD17B4_GeneID:393105F   | GAACCACATGAAGCAGCAGA  |  |
| HSD17B4_GeneID:393105R   | CGTACTCCGCCTTCAGAGAC  |  |
| NR1H4_GeneID:436847F     | CACAACAAACATCGCATTCC  |  |
| NR1H4_GeneID:436847R     | GCTGAAGACTTGGGCTGAAC  |  |
| SCP2_GeneID:393839F      | AGGCGGTAGAGATCGTAGCA  |  |
| SCP2_GeneID:393839R      | ATTGGCAGAGAAGCAGTCGT  |  |
| SLC10A2_GeneID:393329F   | TGAGTTTGCTTGTGCCTGTC  |  |
| SLC10A2_GeneID:393329R   | GCCACAACCAGTTGGAAGAT  |  |
| SLC10A3_GeneID:406519F   | TGATGAGTGCAGGAGTGGAG  |  |
| SLC10A3_GeneID:406519R   | AGGATGGAGATGACGTCTGG  |  |
| SLC10A7_GeneID:445025F   | AACCAACGAGACCAAACCAG  |  |
| SLC10A7_GeneID:445025R   | CAATACTCGGGTCGTCAGGT  |  |
| SLC27A2_GeneID:449925F   | ACACTTACCGGGATGCAGAC  |  |
| SLC27A2_GeneID:449925R   | GTCTTGTGTCTCCGCCTCTC  |  |
| SLCO1C_GeneID:326845F    | GTAACGGGTGGAGTGATGCT  |  |
| SLCO1C_GeneID:326845R    | GGCAGGAGGATTGTGTTTGT  |  |
| SLCO2B_GeneID:792084F    | GACTCAACTCCAGCCTTTGC  |  |
| SLCO2B_GeneID:792084R    | TCGACATACAAGCGAAGCAC  |  |
| VPS18_GeneID:100005887F  | CTGGAGGTTGAACGTGGTTT  |  |
| VPS18_GeneID:100005887R  | GCAGGAGCAAGAAGTGAAC   |  |
